# Supplementary material
Source: ML conference proceedings conference paper supplement (https://openaccess.thecvf.com/content/CVPR2022/html/Hassid_More_Than_Words_CVPR_2022_paper.html)
Supplement: Supplementary file 1 [file Hassid_More_Than_Words_CVPR_2022_supplemental.pdf]

## A. Detailed model architecture

|                        |                                        |                                                                                 |
|------------------------|----------------------------------------|---------------------------------------------------------------------------------|
| Video Encoder          | Input size                             | $D_w = D_h = 128, D_c = 1$                                                      |
|                        | Max Pooling per layer                  | (F, T, T, T)                                                                    |
|                        | Number of output channels per layer    | (64, 128, 256, 512, 512)                                                        |
|                        | Stride per layer                       | (2, 1, 1, 1, 1)                                                                 |
|                        | Kernel size (for all layers)           | (3, 3, 3)                                                                       |
|                        | Activation (for all layers)            | ReLU                                                                            |
|                        | Normalization (for all layers)         | Group Norm                                                                      |
| Text Encoder           | Input size                             | $D_e = 512$                                                                     |
|                        | Conv layers $\times 3$                 | 2048 $5 \times 1$ kernel with $1 \times 1$ stride                               |
|                        | Activation (for all Conv layers)       | ReLU                                                                            |
|                        | Bi-LSTM                                | 1024-dim per direction                                                          |
|                        | Normalization (for all Conv layers)    | Batch Norm                                                                      |
| Multi Source Attention | Attention input size                   | $D_m = 2048$                                                                    |
|                        | GMM attention (per source)             | 128-dim context                                                                 |
|                        | Linear Projection                      | Fully connected layer                                                           |
| Decoder                | PreNet                                 | 2 fully connected layers with 256 neurons and ReLU act.                         |
|                        | LSTM $\times 2$                        | 1024-dim                                                                        |
|                        | Bi-LSTM                                | 1024-dim per direction                                                          |
|                        | PostNet                                | 5 conv layers with $512 \times 1$ kernel with $1 \times 1$ stride and TanH act. |
|                        | Normalization (for all Decoder layers) | Batch Norm                                                                      |
|                        | Teacher forcing prob                   | 1.0                                                                             |

## B. Training hyperparameters

|                |                              |                                            |
|----------------|------------------------------|--------------------------------------------|
| Training       | learning rate                | 0.0003                                     |
|                | learning rate scheduler type | Linear Rampup with Exponential Decay       |
|                | scheduler decay start        | 40k steps                                  |
|                | scheduler decay end          | 300k steps                                 |
|                | scheduler warm-up            | 400 steps                                  |
|                | batch size                   | 512                                        |
| Optimizer      | optimizer details            | Adam with $\beta_1 = 0.9, \beta_2 = 0.999$ |
| Regularization | L2 regularization factor     | 1e-06                                      |

### C. Word error rate discussion

As explained in [Sec. 4.4](#), our VoxCeleb2 transcripts are automatically generated and thus contain transcription errors. As a result one can expect the WER for models trained on this data to be non-zero. In order to validate this hypothesis, that the result of such noisy data leads to a non-zero WER, we trained a version of the our model that accepts only text as input (without silent video), denoted as TTS-OUR. TTS-OUR was trained twice, once on the LibriTTS [\[64\]](#) dataset, and a second time when using our in-the-wild LSVSR dataset. When looking at [Table 6](#) it is clear that when trained on LibriTTS this model achieves a low WER of 7%, while the same model when trained on in-the-wild dataset get a WER of 27%. This suggests that a WER in the region of [20%, 30%] should be expected when using LSVSR.

That being said, we believe reporting WER is valuable as a sanity check for noisy datasets, specially when trying to capture more than just the words.

| Training data | WER |
|---------------|-----|
| LIBRITTS      | 7%  |
| LSVSR         | 27% |

Table 6. Comparison of WER on the VoxCeleb2 test set for our text only TTS model (TTS-OUR) when trained on different datasets.
